# Supplementary material
Source: Springer Nature journal article supplement (https://www.springermedizin.de/resource/supplementary/13063_2009_359_MOESM1_ESM.pdf/9618060)

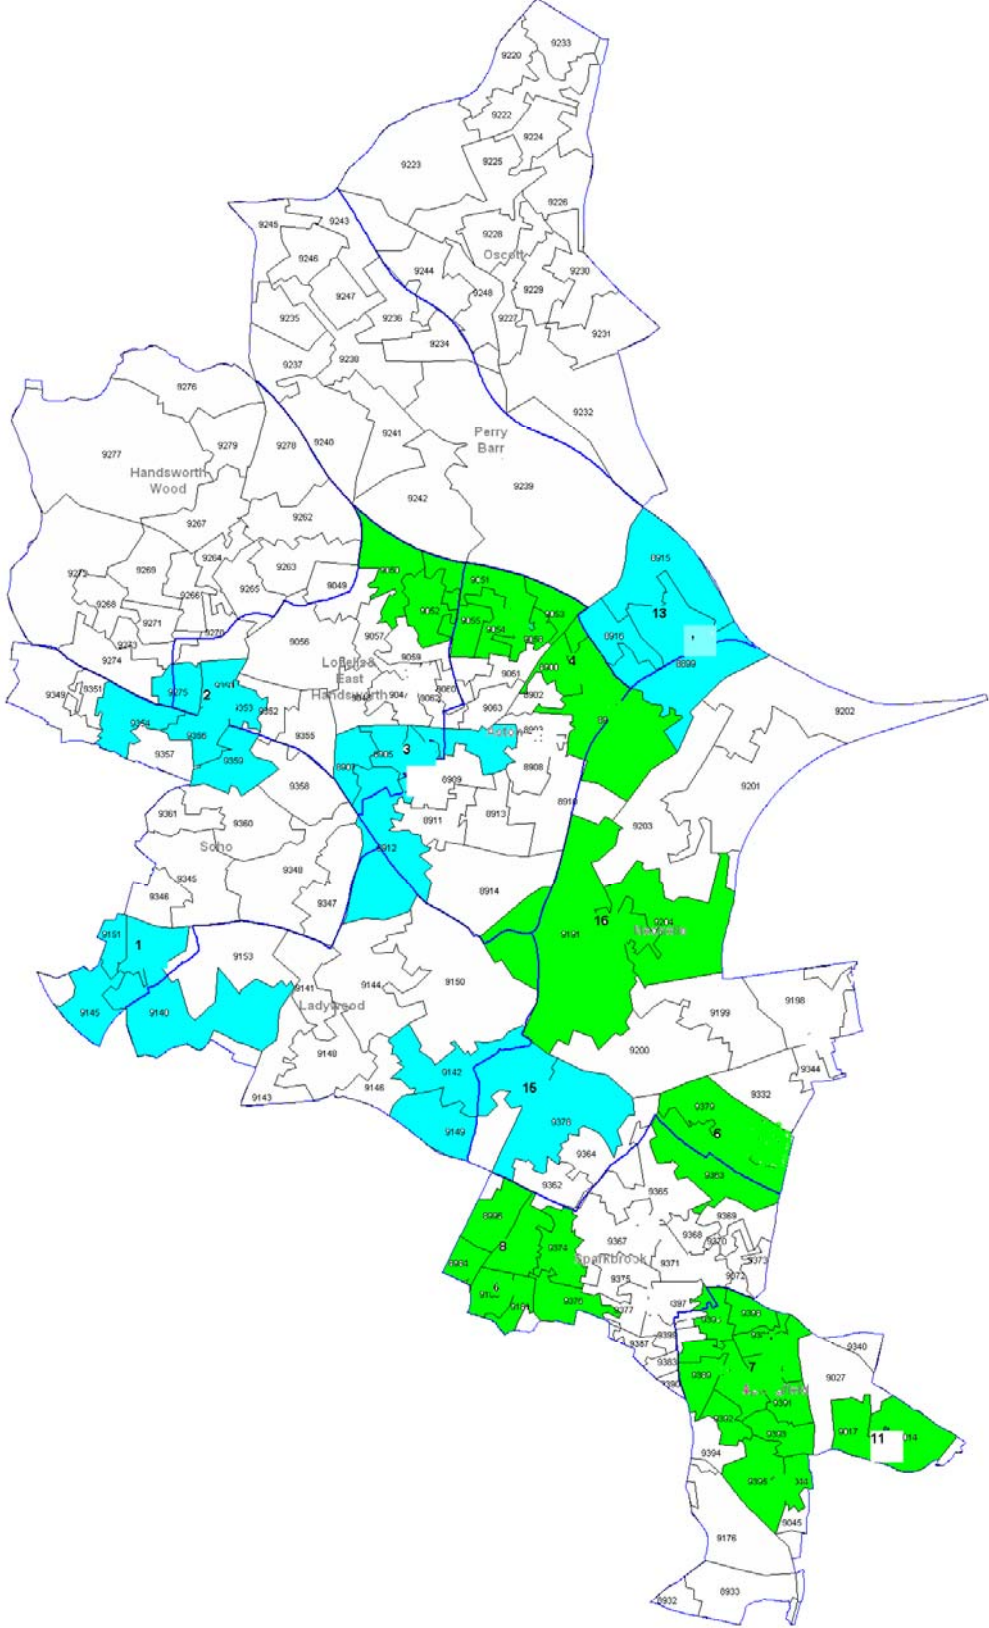

**Key**

-  Control areas
-  Intervention areas

Supplement: MOESM1 [file 9618060]
